# Supplementary material for: Nutrimetabolomics reveals food-specific compounds in urine of adults consuming a DASH-style diet
Source: PubMed Central journal article supplement (PMC6981146; doi:10.1038/s41598-020-57979-8), 2020-01-24

## Supplemental File: Relative Metabolism of Food-Specific Compounds (FSCs) Detected in Urine

Following analysis of food samples using LC/MS, food compounds were categorized as FSCs as described in the manuscript. These FSCs were filtered based on their presence in at least 1 urine sample (see Table 1, Column 4 in the manuscript). The resulting “food-specific signatures” were used to determine the relative metabolism for each food. A “signature” is defined in this study as an aggregate of all FSC for a food that were also detected in urine and includes the total sum of that food’s FSC abundance values.

The table shows p-values for each of the food signatures tested. Compounds passing significance were significant after adjusting for the number of foods tested. Graphs are included for each food with the name of the food listed on the y-axis.

| <b>FOOD</b>            | <b>Days included</b> | <b>ANOVA.p.value</b> | <b>Continuous p.value</b> |
|------------------------|----------------------|----------------------|---------------------------|
| <b>grapefruit</b>      | <b>All Days</b>      | <b>0.0058</b>        | <b>0.0007</b>             |
| grapefruit             | Day 2                | 0.0050               | 0.0002                    |
| grapefruit             | Day 5                | 0.0050               | 0.7691                    |
| <b>apple.juice</b>     | <b>All Days</b>      | <b>0.1460</b>        | <b>0.0117</b>             |
| <b>blueberries</b>     | <b>All Days</b>      | <b>0.7263</b>        | <b>0.9842</b>             |
| blueberries            | Day 2                | 0.8257               | 0.3170                    |
| blueberries            | Day 6                | 0.8257               | 0.5356                    |
| <b>broccoli</b>        | <b>All Days</b>      | <b>0.7817</b>        | <b>0.1842</b>             |
| <b>cucumber</b>        | <b>All Days</b>      | <b>0.4594</b>        | <b>0.4849</b>             |
| cucumber               | Day 1                | 0.1178               | 0.7564                    |
| cucumber               | Day 2                | 0.1178               | 0.0404                    |
| <b>peanut.butter</b>   | <b>All Days</b>      | <b>0.2588</b>        | <b>0.6440</b>             |
| peanut.butter          | Day 1                | 0.0771               | 0.8440                    |
| peanut.butter          | Day 2                | 0.0771               | 0.0252                    |
| peanut.butter          | Day 3                | 0.0771               | 0.4052                    |
| <b>beef.tenderloin</b> | <b>All Days</b>      | <b>0.9791</b>        | <b>0.7886</b>             |

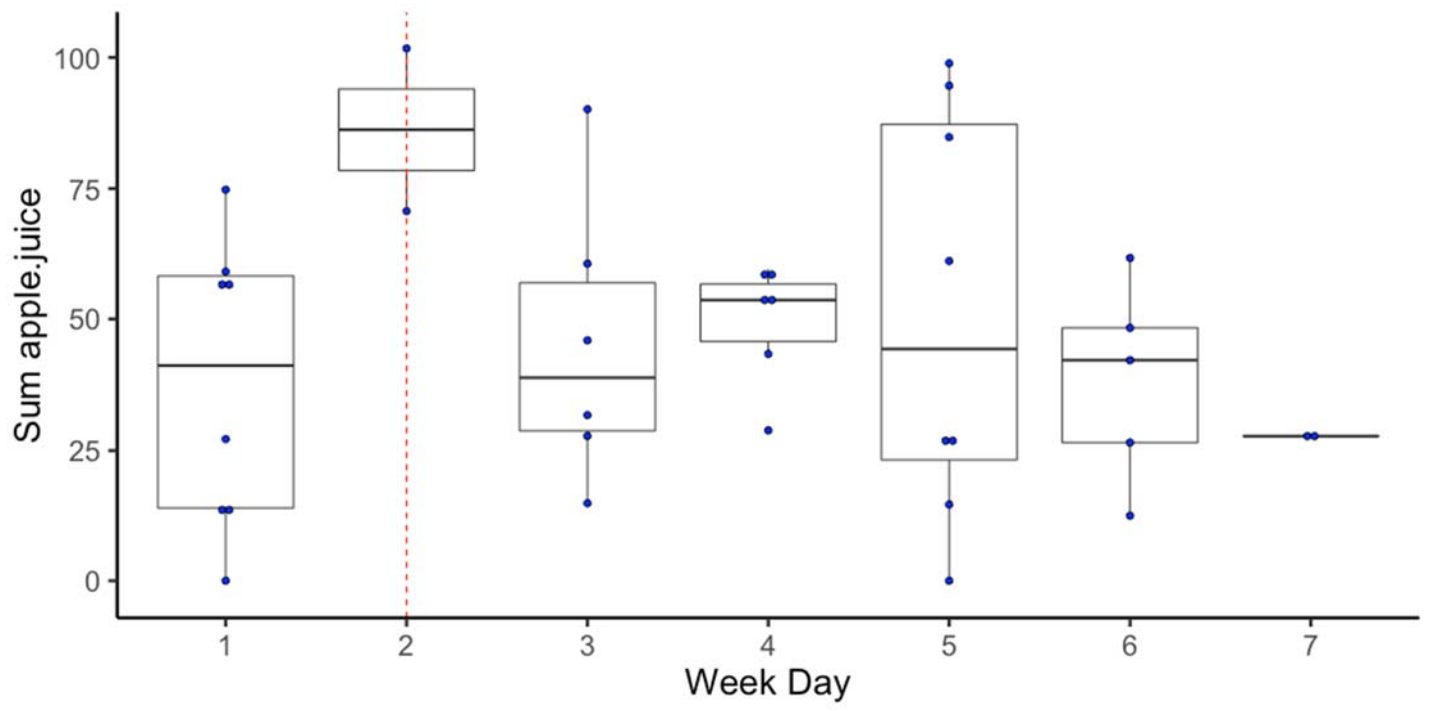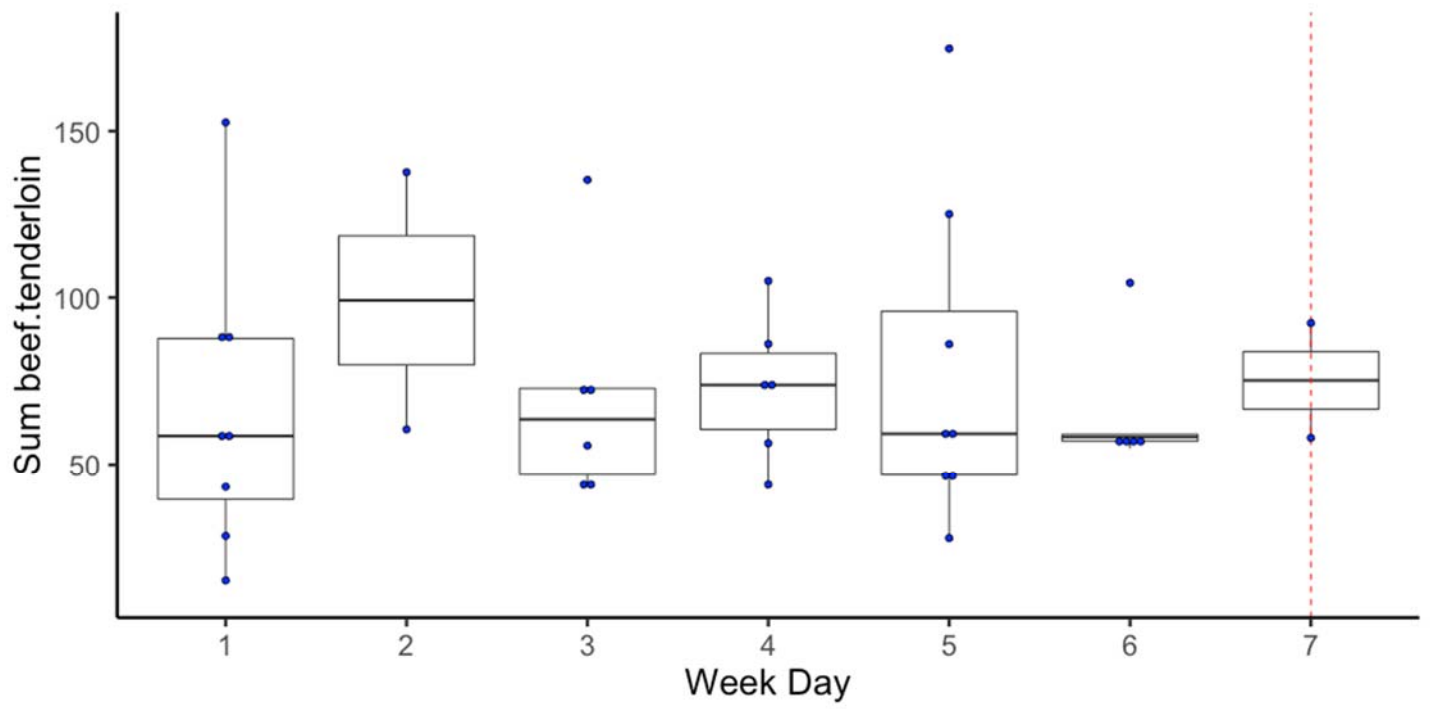

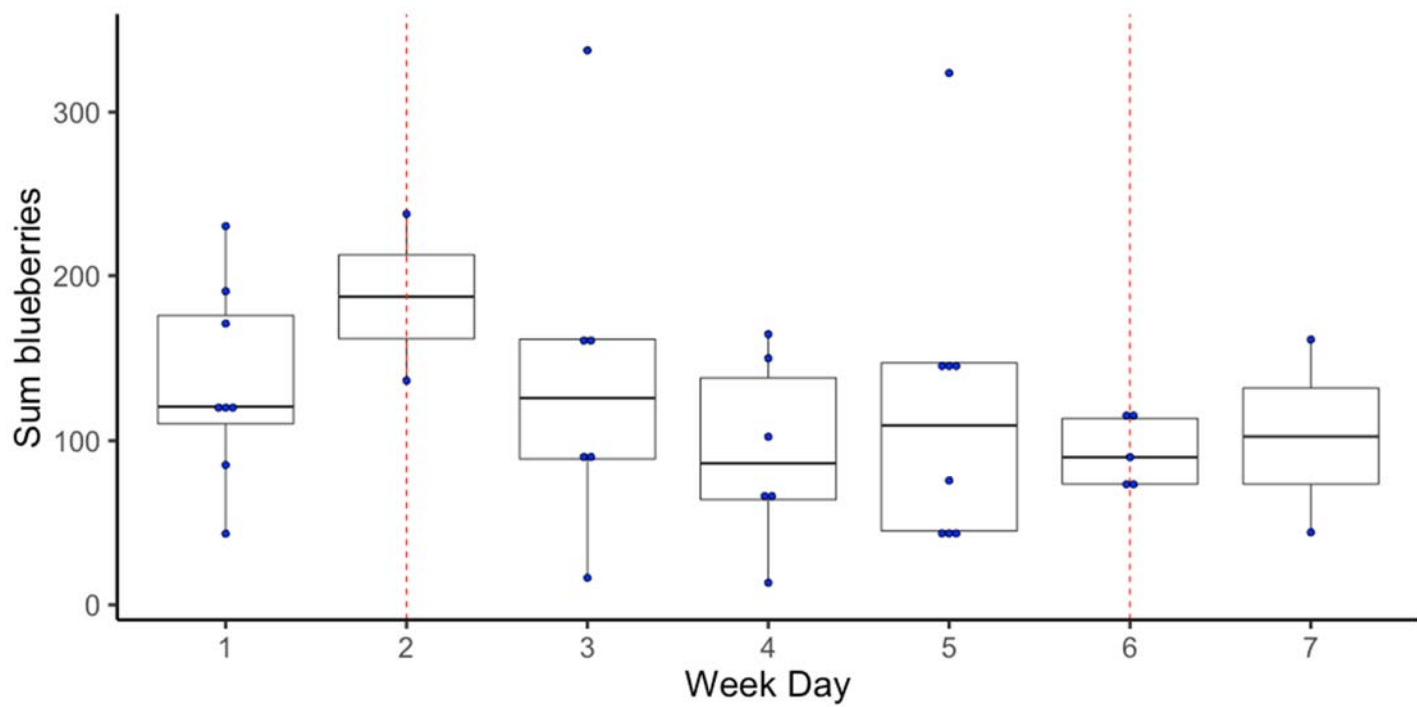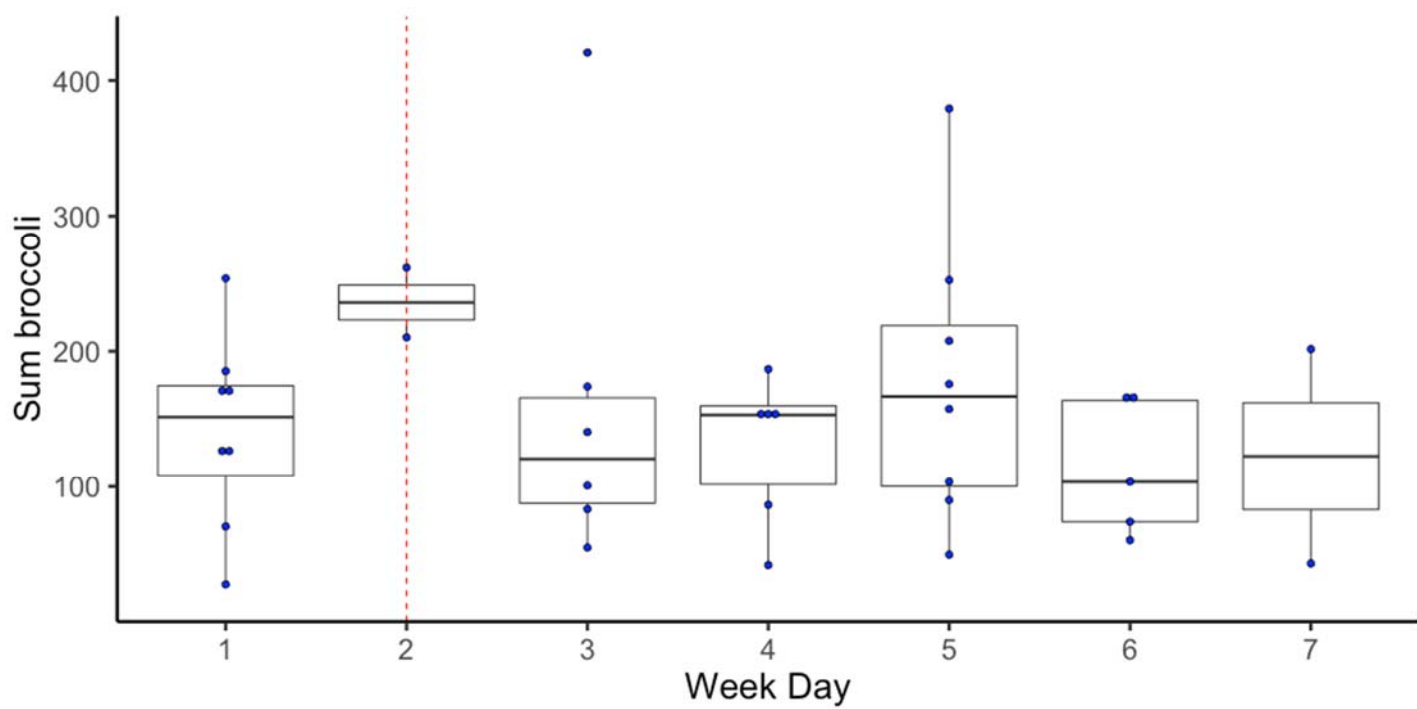

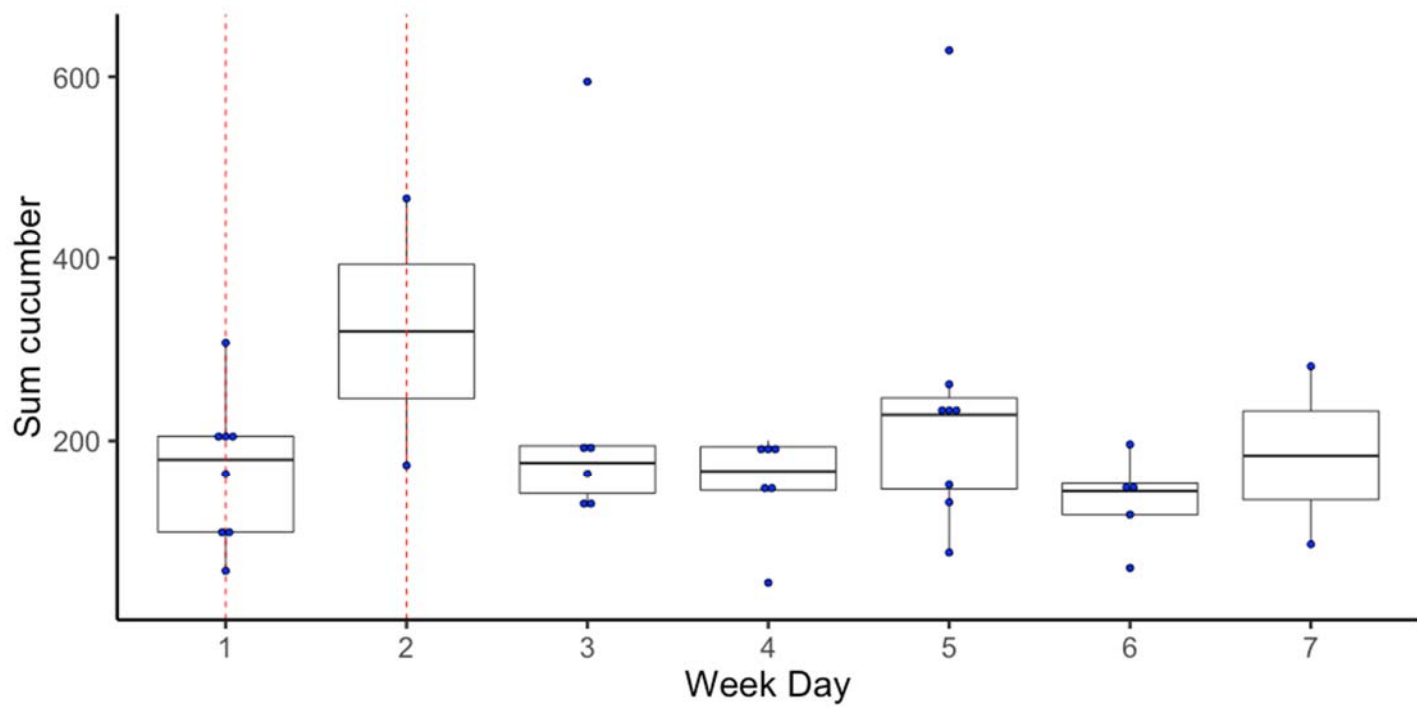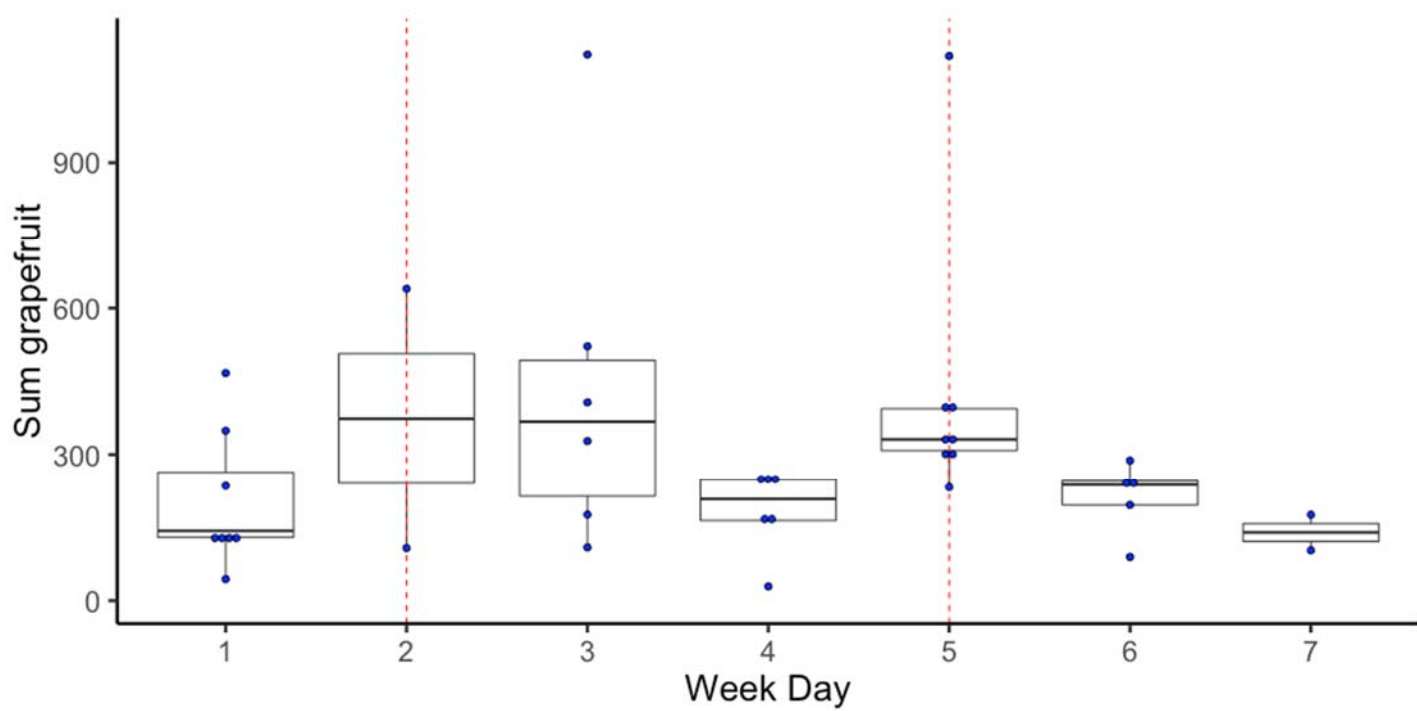

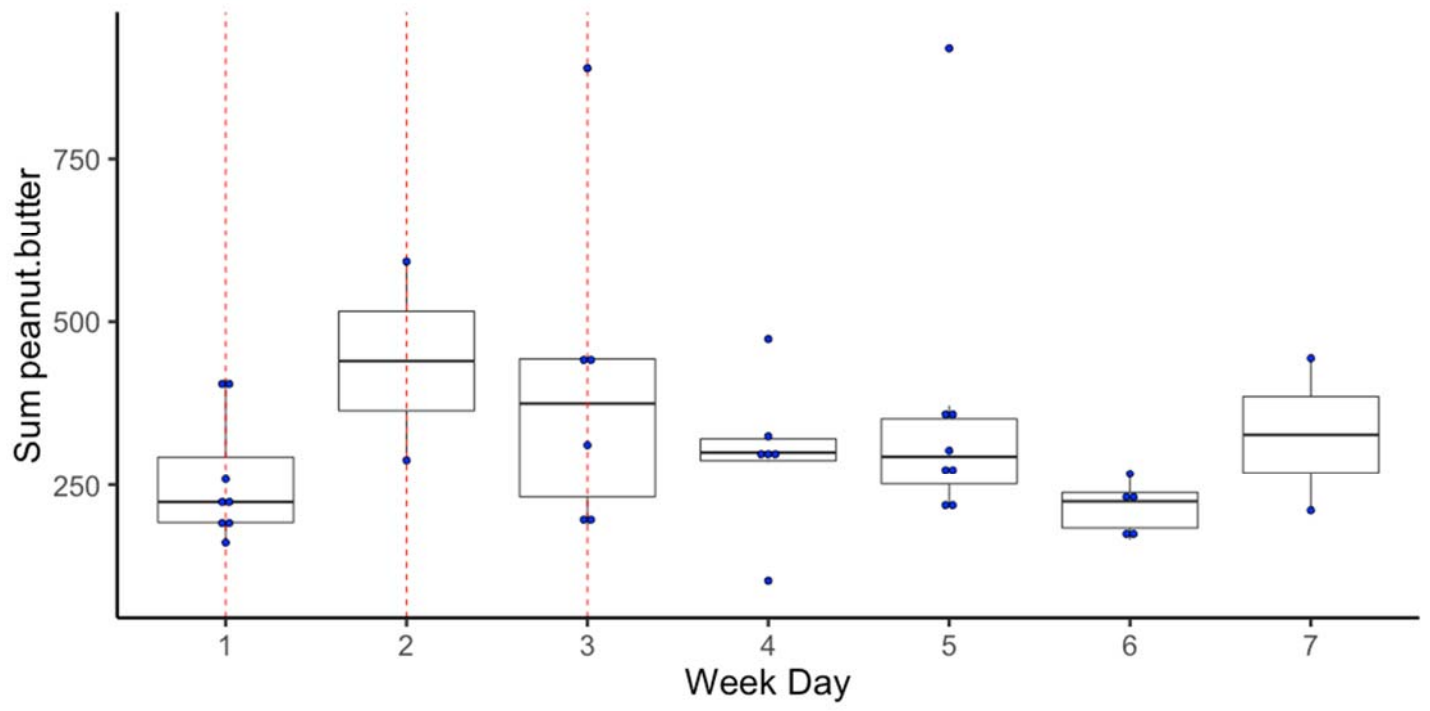

Supplement: 41598_2020_57979_MOESM4_ESM.pdf [file 41598_2020_57979_MOESM4_ESM.pdf]
