# Supplementary material for: Nutrimetabolomics reveals food-specific compounds in urine of adults consuming a DASH-style diet
Source: PubMed Central journal article supplement (PMC6981146; doi:10.1038/s41598-020-57979-8), 2020-01-24
Supplement: 41598_2020_57979_MOESM2_ESM.pdf [file 41598_2020_57979_MOESM2_ESM.pdf]

**Example of a DASH menu's macronutrient summary****Chicken/FISH**

| <b>DAY</b>              | <b>Energy (kcal)</b> | <b>PRO (g)</b>     | <b>FAT (g)</b>     | <b>CHO (g)</b>     | <b>Fiber (g)</b>   | <b>SAT FAT (g)</b> | <b>Na (mg)</b>     |
|-------------------------|----------------------|--------------------|--------------------|--------------------|--------------------|--------------------|--------------------|
| 1                       | 2221.82              | 100.94             | 66.29              | 331.84             | 31.92              | 13.98              | 2415.69            |
| 2                       | 2226.33              | 100.04             | 64.01              | 343.28             | 53.79              | 16.67              | 2393.71            |
| 3                       | 2172.25              | 100.13             | 60.62              | 317.89             | 30.33              | 14.21              | 2399.11            |
| 4                       | 2189.91              | 101.63             | 67.46              | 325.84             | 55.06              | 14.73              | 2436.76            |
| 5                       | 2194.55              | 101.02             | 62.18              | 332.56             | 43.29              | 19.54              | 2161.82            |
| 6                       | 2225.8               | 100.18             | 68.82              | 320.29             | 38.87              | 15.82              | 2271.88            |
| 7                       | 2191.01              | 100.02             | 61.67              | 328.59             | 36.42              | 14.06              | 2494.08            |
| <b>AVG CHICKEN/FISH</b> | <b>2203.095714</b>   | <b>100.5657143</b> | <b>64.43571429</b> | <b>328.6128571</b> | <b>41.38285714</b> | <b>15.57285714</b> | <b>2367.578571</b> |

**PORK**

| <b>DAY</b>      | <b>Energy (kcal)</b> | <b>PRO (g)</b>     | <b>FAT (g)</b>     | <b>CHO (g)</b>     | <b>Fiber (g)</b>   | <b>SAT FAT (g)</b> | <b>Na (mg)</b>     |
|-----------------|----------------------|--------------------|--------------------|--------------------|--------------------|--------------------|--------------------|
| 1               | 2204.49              | 99.23              | 65.99              | 325.39             | 29.73              | 16.61              | 2356.92            |
| 2               | 2202.96              | 99.42              | 63.6               | 339.83             | 55.77              | 17.41              | 2339.22            |
| 3               | 2199.77              | 99.38              | 60.65              | 326.33             | 35.22              | 16.93              | 2368.18            |
| 4               | 2196.84              | 99.73              | 66.68              | 321.17             | 50.87              | 18.35              | 2420.77            |
| 5               | 2155.89              | 99.8               | 61.9               | 321.52             | 44.94              | 15.67              | 2455.34            |
| 6               | 2147.14              | 96.46              | 59.62              | 322.08             | 40.51              | 14.88              | 2391.58            |
| 7               | 2153.48              | 97.06              | 58.7               | 337.24             | 38.81              | 12.74              | 2182.24            |
| <b>AVG PORK</b> | <b>2180.081429</b>   | <b>98.72571429</b> | <b>62.44857143</b> | <b>327.6514286</b> | <b>42.26428571</b> | <b>16.08428571</b> | <b>2359.178571</b> |

## Example of a DASH-PORK (DASH-P) Menu

### Day 1

Foods in Bold Are Provided by the Metabolic Kitchen

#### Breakfast

|                               |          |
|-------------------------------|----------|
| Cheerios                      | 3/4 cup  |
| Skim Milk                     | 10 fl oz |
| Banana                        | 1 medium |
| Cranberry Juice Cocktail      | 12 fl oz |
| Coffee (black) - measure 8 oz | 8 fl oz  |

#### Lunch

|                                   |                 |
|-----------------------------------|-----------------|
| Chef Salad                        |                 |
| <i>Lettuce, Romaine</i>           | 3 cups          |
| <b>Uncured Ham</b>                | <b>32 grams</b> |
| <i>Tomato</i>                     | 1 ea            |
| <i>Baby Carrots</i>               | 10 ea           |
| <i>Cucumber, cubed or diced</i>   | 1/2 cup         |
| <i>Fat Free Shredded Cheese</i>   | 22 grams        |
| <b>Croutons</b>                   | <b>1 packet</b> |
| <b>Oil &amp; Vinegar Dressing</b> | <b>30 grams</b> |
| Melba Rounds                      | 4 pieces        |
| Fruit Cocktail                    | 1 serving       |
| Diet Soda                         | 12 fl oz        |

#### Mid-Afternoon Snack

|                                |             |
|--------------------------------|-------------|
| Honey Multi-Grain Bagel        | 1/2 bagel   |
| <b>Country Crock Margarine</b> | <b>2 ea</b> |
| Crystal Light*                 | 8 fl oz     |

#### Dinner

|                                  |                 |
|----------------------------------|-----------------|
| Kroger Whole Wheat Hamburger Bun | 1 ea            |
| <b>Pork Loin</b>                 | <b>90 grams</b> |
| Barbecue Sauce                   | 25 grams        |
| Corn on the Cob                  | 1 ea            |
| <b>Country Crock Margarine</b>   | <b>4 ea</b>     |
| Mandarin Oranges                 | 1 ea            |
| Passion Fruit Juice              | 6 fl oz         |

#### Evening Snack

|                |                  |
|----------------|------------------|
| <b>Popcorn</b> | <b>1 serving</b> |
| Diet Soda      | 12 fl oz         |

\*Crystal Light can be substituted with water or other beverages sweetened with artificial sweeteners such as Crystal Light or Diet Soda.  
Please refer to the Beverages handout for more information about allowable beverages.

| <b>Day 2- DASH-P</b>                                                                                                                                                                                        |  |                    |
|-------------------------------------------------------------------------------------------------------------------------------------------------------------------------------------------------------------|--|--------------------|
| <b>Foods in Bold Are Provided by the Metabolic Kitchen</b>                                                                                                                                                  |  |                    |
| <b>Breakfast</b>                                                                                                                                                                                            |  |                    |
| Thomas Hearty Light Multi-Grain English Muffins                                                                                                                                                             |  | 1 ea               |
| <b>Reduced Fat JIF Peanut Butter</b>                                                                                                                                                                        |  | <b>11 grams</b>    |
| Grapefruit                                                                                                                                                                                                  |  | 1/2 large fruit    |
| Apple Juice                                                                                                                                                                                                 |  | 8 fl oz            |
| Skim Milk                                                                                                                                                                                                   |  | 6 fl oz            |
| Coffee (black) - measure 8 oz                                                                                                                                                                               |  | 8 fl oz            |
| <b>Lunch</b>                                                                                                                                                                                                |  |                    |
| Soft Taco                                                                                                                                                                                                   |  |                    |
| <i>Ole Extreme Wellness Whole Wheat Tortilla</i>                                                                                                                                                            |  | 1 ea               |
| <i>Ground Pork Taco Filling</i>                                                                                                                                                                             |  | 40 grams           |
| <i>Lettuce, shredded</i>                                                                                                                                                                                    |  | 1/2 cup            |
| <i>Tomato, diced</i>                                                                                                                                                                                        |  | 1/2 cup            |
| <i>Cheddar Fat Free Shredded Cheese</i>                                                                                                                                                                     |  | 14 grams           |
| Baked Tostitos Scoops                                                                                                                                                                                       |  | 1 oz               |
| Banana                                                                                                                                                                                                      |  | 1 small            |
| Blueberries                                                                                                                                                                                                 |  | 1/2 cup            |
| Diet Soda                                                                                                                                                                                                   |  | 12 fl oz           |
| <b>Mid-Afternoon Snack</b>                                                                                                                                                                                  |  |                    |
| Cherry Tomatoes                                                                                                                                                                                             |  | 5 ea               |
| Baby Carrots                                                                                                                                                                                                |  | 5 ea               |
| Cucumber, sliced with peel                                                                                                                                                                                  |  | 1/2 cup            |
| <b>Vegetable Dip</b>                                                                                                                                                                                        |  | <b>30 grams</b>    |
| <b>Dinner</b>                                                                                                                                                                                               |  |                    |
| <b>Uncured Ham</b>                                                                                                                                                                                          |  | <b>50 grams</b>    |
| Broccoli                                                                                                                                                                                                    |  | 1/2 cup            |
| <b>Kraft American Cheese</b>                                                                                                                                                                                |  | <b>9 1/2 grams</b> |
| Aunt Millie Whole Grain Dinner Roll                                                                                                                                                                         |  | 1 ea               |
| Country Crock                                                                                                                                                                                               |  | 2 ea               |
| Side Salad                                                                                                                                                                                                  |  |                    |
| <i>Lettuce, Shredded</i>                                                                                                                                                                                    |  | 1 cup              |
| <b><i>Low Sodium Salad Dressing</i></b>                                                                                                                                                                     |  | <b>15 grams</b>    |
| Vanilla Frozen Yogurt                                                                                                                                                                                       |  | 1/2 cup            |
| Raspberries                                                                                                                                                                                                 |  | 1/2 cup            |
| Ice Tea                                                                                                                                                                                                     |  | 8 fl oz            |
| Water*                                                                                                                                                                                                      |  | 8 oz               |
| <b>Evening Snack</b>                                                                                                                                                                                        |  |                    |
| Reduced Fat Vanilla Wafers                                                                                                                                                                                  |  | 5 ea               |
| Water*                                                                                                                                                                                                      |  | 8 fl oz            |
| *Water can be substituted with beverages sweetened with artificial sweeteners such as Crystal Light or Diet Sodas.<br>Please refer to the Beverages handout for more information about allowable beverages. |  |                    |

| <b>Day 3- DASH-P</b>                                                                                               |  |                              |
|--------------------------------------------------------------------------------------------------------------------|--|------------------------------|
| <b>Foods in Bold Are Provided by the Metabolic Kitchen</b>                                                         |  |                              |
| <b>Breakfast</b>                                                                                                   |  |                              |
| Carbmaster Yogurt                                                                                                  |  | 1 container ( grams)         |
| <b>Quaker Natural Granola - Oats, Honey &amp; Raisins</b>                                                          |  | <b>51 grams</b>              |
| Banana                                                                                                             |  | 1 medium                     |
| Orange Juice                                                                                                       |  | 4 fl oz                      |
| Coffee (black) - measure 8 oz                                                                                      |  | 8 1/2 cup                    |
| <b>Lunch</b>                                                                                                       |  |                              |
| Tomato Soup (25% less sodium)                                                                                      |  | 1/3 cup                      |
| Low Sodium Oyster Crackers                                                                                         |  | 5 ea                         |
| Healthy Life 100% Whole Wheat Bread                                                                                |  | 1 slice                      |
| <b>Uncured Ham</b>                                                                                                 |  | <b>38 grams</b>              |
| Reduced Fat Cheddar Cheese                                                                                         |  | 22 grams                     |
| Country Crock                                                                                                      |  | 3 each                       |
| Apple                                                                                                              |  | 1 ea                         |
| Crystal Light*                                                                                                     |  | 8 fluid oz                   |
| <b>Mid-Afternoon Snack</b>                                                                                         |  |                              |
| Celery strips, 4" long                                                                                             |  | 8 ea                         |
| <b>Reduced Fat JIF Peanut Butter</b>                                                                               |  | <b>22 grams</b>              |
| Diet Soda                                                                                                          |  | 1 can                        |
| <b>Dinner</b>                                                                                                      |  |                              |
| <b>Pork Loin</b>                                                                                                   |  | <b>70 grams</b>              |
| Gravy, turkey or pork, in jar                                                                                      |  | 23 grams                     |
| Healthy Life 100% Whole Wheat Bread                                                                                |  | 1 slice                      |
| <b>Country Crock Margarine</b>                                                                                     |  | <b>5 ea</b>                  |
| <b>Jelly, reduced sugar</b>                                                                                        |  | <b>1 packet</b>              |
| Sweet Potatoes                                                                                                     |  | 1/2 cup                      |
| Mini Marshmallows                                                                                                  |  | 30 ea                        |
| <b>Green Beans</b>                                                                                                 |  |                              |
| <b>Mixed Fruit</b>                                                                                                 |  | <b>1/2 cup (1 fruit cup)</b> |
| Ice Tea                                                                                                            |  | 8 fl oz                      |
| <b>Evening Snack</b>                                                                                               |  |                              |
| <b>Quaker Chocolate Chunk Granola Bar</b>                                                                          |  | <b>1 ea</b>                  |
| Water*                                                                                                             |  | 8 fl oz                      |
| *Water can be substituted with beverages sweetened with artificial sweeteners such as Crystal Light or Diet Sodas. |  |                              |
| Please refer to the Beverages handout for more information about allowable beverages.                              |  |                              |

| <b>Day 4- DASH-P</b>                                                                                               |  |                  |
|--------------------------------------------------------------------------------------------------------------------|--|------------------|
| <b>Foods in Bold Are Provided by the Metabolic Kitchen</b>                                                         |  |                  |
| <b>Breakfast</b>                                                                                                   |  |                  |
| Cheerios                                                                                                           |  | 1 cup            |
| 1% Milk                                                                                                            |  | 10 fl oz         |
| Peaches                                                                                                            |  | 1/2 cup          |
| Orange Juice                                                                                                       |  | 6 fl oz          |
| Coffee (black) - measure 8 oz                                                                                      |  | 1 cup            |
| <b>Lunch</b>                                                                                                       |  |                  |
| Pork Quesadilla                                                                                                    |  |                  |
| <i>Thomas Hearty Multi-Grain Light English Muffins</i>                                                             |  | 1 ea             |
| <b>Pork Loin</b>                                                                                                   |  | <b>20 grams</b>  |
| <i>Reduced Fat Cheddar Cheese</i>                                                                                  |  | 22.6 grams       |
| <i>Onion, chopped</i>                                                                                              |  | 1/4 cup          |
| <i>Green Pepper, chopped</i>                                                                                       |  | 1/2 cup          |
| <i>Red Pepper, chopped</i>                                                                                         |  | 1/2 cup          |
| Banana                                                                                                             |  | 1 medium         |
| Cherry Tomatoes                                                                                                    |  | 10 ea            |
| Baby Carrots                                                                                                       |  | 10 ea            |
| <b>Vegetable Dip</b>                                                                                               |  | <b>32 grams</b>  |
| Diet Soda                                                                                                          |  | 1 can            |
| Water*                                                                                                             |  | 8 fluid oz       |
| <b>Mid-Afternoon Snack</b>                                                                                         |  |                  |
| Carbmaster Yogurt                                                                                                  |  | 1/2 container    |
| <b>Quaker Natural Granola</b>                                                                                      |  | <b>25 grams</b>  |
| Crystal Light*                                                                                                     |  | 8 fl oz          |
| <b>Dinner</b>                                                                                                      |  |                  |
| Pork Waldroff Salad                                                                                                |  |                  |
| <b>Pork Loin</b>                                                                                                   |  | <b>65 grams</b>  |
| Romaine Lettuce, Shredded                                                                                          |  | 2 1/2 cups       |
| Parmesan Cheese                                                                                                    |  | 2 tsp            |
| Green Beans, string                                                                                                |  | 1/2 cup          |
| Mushrooms                                                                                                          |  | 1/2 cup          |
| Pears                                                                                                              |  | 1 cup            |
| <b>Low Sodium Salad Dressing</b>                                                                                   |  | <b>10 grams</b>  |
| Peas                                                                                                               |  | 1/2 cup          |
| <b>Country Crock Margarine</b>                                                                                     |  | <b>3 ea</b>      |
| Melba Rounds                                                                                                       |  | 4 ea             |
| Apple Cinnamon Fruit Crisp                                                                                         |  | 1 ea             |
| Water*                                                                                                             |  | 8 fl oz          |
| <b>Evening Snack</b>                                                                                               |  |                  |
| <b>Popcorn</b>                                                                                                     |  | <b>1 serving</b> |
| Diet Soda (any flavor)                                                                                             |  | 1 12 oz can      |
| *Water can be substituted with beverages sweetened with artificial sweeteners such as Crystal Light or Diet Sodas. |  |                  |
| Please refer to the Beverages handout for more information about allowable beverages.                              |  |                  |

|                                                                                                                                                                                                             |           |              |
|-------------------------------------------------------------------------------------------------------------------------------------------------------------------------------------------------------------|-----------|--------------|
| <b>Day 5- DASH-P</b>                                                                                                                                                                                        |           |              |
| <b>Foods in Bold Are Provided by the Metabolic Kitchen</b>                                                                                                                                                  |           |              |
| <b>Breakfast</b>                                                                                                                                                                                            |           |              |
| Quaker Instant Oatmeal (any fruit & cream variety)                                                                                                                                                          |           | 1 ea         |
| Country Crock                                                                                                                                                                                               |           | 2 ea         |
| Grapefruit                                                                                                                                                                                                  | 1/2       | medium fruit |
| Skim Milk                                                                                                                                                                                                   | 11        | fluid oz     |
| <b>Lunch</b>                                                                                                                                                                                                |           |              |
| Pork Tenderloin Sandwich:                                                                                                                                                                                   |           |              |
| <i>Kroger Whole Wheat Hamburger Bun</i>                                                                                                                                                                     |           | 1 ea         |
| <b>Pork Loin</b>                                                                                                                                                                                            | <b>50</b> | <b>grams</b> |
| <i>Lettuce, inner leaf</i>                                                                                                                                                                                  | 2         | ea           |
| <i>Tomato, slice</i>                                                                                                                                                                                        | 1         | ea           |
| <b>Light Mayonnaise</b>                                                                                                                                                                                     | <b>2</b>  | <b>Tbsp</b>  |
| Lay's Lightly Salted Potato Chips                                                                                                                                                                           | 28        | gram         |
| Kiwi Fruit                                                                                                                                                                                                  | 1         | ea           |
| Crystal Light                                                                                                                                                                                               | 1         | packet       |
| <b>Mid-Afternoon Snack</b>                                                                                                                                                                                  |           |              |
| Green Pepper, sliced                                                                                                                                                                                        | 3/4       | cup          |
| Red Pepper, sliced                                                                                                                                                                                          | 3/4       | cup          |
| <b>Vegetable Dip</b>                                                                                                                                                                                        | <b>25</b> | <b>grams</b> |
| Diet Soda (any flavor)                                                                                                                                                                                      | 1         | can          |
| <b>Dinner</b>                                                                                                                                                                                               |           |              |
| <u>Pizza:</u>                                                                                                                                                                                               |           |              |
| <i>Thomas Hearty Multi-Grain Light English Muffins</i>                                                                                                                                                      |           | 1 ea         |
| <i>Pizza Sauce</i>                                                                                                                                                                                          | 3/4       | cup          |
| <b>Uncured Ham</b>                                                                                                                                                                                          | <b>28</b> | <b>grams</b> |
| <i>Pineapple</i>                                                                                                                                                                                            | 1/2       | cup          |
| <i>Fat Free Mozzarella Cheese</i>                                                                                                                                                                           | 1/3       | cup          |
| Frozen Yogurt                                                                                                                                                                                               | 1/2       | cup          |
| Raspberries                                                                                                                                                                                                 | 1/2       | cup          |
| Frozen Fruit Bar                                                                                                                                                                                            | 1         | ea           |
| Water*                                                                                                                                                                                                      | 8         | fl oz        |
| <b>Evening Snack</b>                                                                                                                                                                                        |           |              |
| <b>Quaker Chocolate Chunk Granola Bar</b>                                                                                                                                                                   |           | <b>1 ea</b>  |
| *Water can be substituted with beverages sweetened with artificial sweeteners such as Crystal Light or Diet Sodas.<br>Please refer to the Beverages handout for more information about allowable beverages. |           |              |

| <b>Day 6- DASH-P</b>                                                                                                                                                                                        |  |                       |
|-------------------------------------------------------------------------------------------------------------------------------------------------------------------------------------------------------------|--|-----------------------|
| <b>Foods in Bold Are Provided by the Metabolic Kitchen</b>                                                                                                                                                  |  |                       |
| <b>Breakfast</b>                                                                                                                                                                                            |  |                       |
| Kellogg's Eggo Golden Oat Waffles                                                                                                                                                                           |  | 2 ea                  |
| <b>Country Crock Margarine</b>                                                                                                                                                                              |  | <b>2 ea</b>           |
| Syrup                                                                                                                                                                                                       |  | 1/2 Tbsp.             |
| Blueberries                                                                                                                                                                                                 |  | 1/2 cup               |
| Skim Milk                                                                                                                                                                                                   |  | 10 fluid oz           |
| Coffee (black) - measure 8 oz                                                                                                                                                                               |  | 1 cup                 |
| <b>Lunch</b>                                                                                                                                                                                                |  |                       |
| <u>Ham &amp; Veggie Wrap</u>                                                                                                                                                                                |  |                       |
| <i>Ole Extreme Wellness Whole Wheat Tortilla</i>                                                                                                                                                            |  | 1 ea                  |
| <b><i>Uncured Ham</i></b>                                                                                                                                                                                   |  | <b>42 grams</b>       |
| <i>Lettuce, shredded</i>                                                                                                                                                                                    |  | 1/2 cup               |
| <i>Tomatoes, diced</i>                                                                                                                                                                                      |  | 1/2 cup               |
| <i>Light Mayonnaise</i>                                                                                                                                                                                     |  | 1 packet              |
| Melba Rounds                                                                                                                                                                                                |  | 8 ea                  |
| Banana                                                                                                                                                                                                      |  | 1 medium              |
| Crystal Light*                                                                                                                                                                                              |  | 1 packet              |
| <b>Mid-Afternoon Snack</b>                                                                                                                                                                                  |  |                       |
| Celery, 4 inch strips                                                                                                                                                                                       |  | 6 ea                  |
| <b>Reduced Fat Peanut Butter</b>                                                                                                                                                                            |  | <b>1 Tbsp</b>         |
| Crystal Light*                                                                                                                                                                                              |  | 1 packet              |
| <b>Dinner</b>                                                                                                                                                                                               |  |                       |
| Southwestern Pork Salad                                                                                                                                                                                     |  |                       |
| <i>Lettuce, romaine, shredded</i>                                                                                                                                                                           |  | 2 cups                |
| <i>Canola Oil</i>                                                                                                                                                                                           |  | 5 grams               |
| <b><i>Pork Loin</i></b>                                                                                                                                                                                     |  | <b>60 grams</b>       |
| <i>Red Pepper, chopped</i>                                                                                                                                                                                  |  | 1/4 cup               |
| <i>Green Pepper, chopped</i>                                                                                                                                                                                |  | 1/4 cup               |
| <i>Onions, chopped</i>                                                                                                                                                                                      |  | 1/4 cup               |
| <i>Mild Cheddar Cheese, Shredded</i>                                                                                                                                                                        |  | 15 grams              |
| <i>Salsa</i>                                                                                                                                                                                                |  | 30 grams              |
| <i>Corn</i>                                                                                                                                                                                                 |  | 1/2 cup               |
| Baked Tostitos Scoops                                                                                                                                                                                       |  | 1 oz                  |
| Mandarin Oranges                                                                                                                                                                                            |  | 1/2 cup (1 fruit cup) |
| Peach Fruit Crisp                                                                                                                                                                                           |  | 1 ea                  |
| Ice Tea                                                                                                                                                                                                     |  | 12 fl oz              |
| <b>Evening Snack</b>                                                                                                                                                                                        |  |                       |
| <b>Popcorn</b>                                                                                                                                                                                              |  | <b>1 serving</b>      |
| Diet Soda                                                                                                                                                                                                   |  | 1 can                 |
| *Water can be substituted with beverages sweetened with artificial sweeteners such as Crystal Light or Diet Sodas.<br>Please refer to the Beverages handout for more information about allowable beverages. |  |                       |
|                                                                                                                                                                                                             |  |                       |
|                                                                                                                                                                                                             |  |                       |
|                                                                                                                                                                                                             |  |                       |

| <b>Day 7- DASH-P</b>                                                                                                                                                                                        |                        |                     |
|-------------------------------------------------------------------------------------------------------------------------------------------------------------------------------------------------------------|------------------------|---------------------|
| <b>Foods in Bold Are Provided by the Metabolic Kitchen</b>                                                                                                                                                  |                        |                     |
| <b>Breakfast</b>                                                                                                                                                                                            |                        |                     |
| Honey Multi-Grain Bagel                                                                                                                                                                                     |                        | 1 ea                |
| <b>Country Crock Margarine</b>                                                                                                                                                                              |                        | <b>4 ea</b>         |
| <b>Jelly, reduced sugar</b>                                                                                                                                                                                 |                        | <b>2 packets</b>    |
| Strawberries                                                                                                                                                                                                |                        | 1/2 cup             |
| Skim Milk                                                                                                                                                                                                   |                        | 4 fluid oz          |
| Coffee (black) - measure 8 oz                                                                                                                                                                               |                        | 1 cup               |
| <b>Lunch</b>                                                                                                                                                                                                |                        |                     |
| <u>Asain Beef Stir-Fry</u>                                                                                                                                                                                  |                        |                     |
|                                                                                                                                                                                                             | <b>Beef Tenderloin</b> | <b>22 grams</b>     |
|                                                                                                                                                                                                             | Canola Oil             | 9 grams             |
|                                                                                                                                                                                                             | Broccoli               | 1 cup               |
|                                                                                                                                                                                                             | Mushrooms              | 1/2 cup             |
|                                                                                                                                                                                                             | Corn                   | 1/2 cup             |
|                                                                                                                                                                                                             | Snowpeas               | 50 grams            |
|                                                                                                                                                                                                             | Soy Sauce              | 0.6 Tbsp            |
| Brown Rice                                                                                                                                                                                                  |                        | 3/4 cup             |
|                                                                                                                                                                                                             | Peas & Carrots         | 1/2 cup             |
|                                                                                                                                                                                                             | <b>Pineapple</b>       | <b>1/2 cup</b>      |
| Rold Gold Tiny Twist Pretzels                                                                                                                                                                               |                        | 13 each             |
| Apple                                                                                                                                                                                                       |                        | 1 medium            |
| Water*                                                                                                                                                                                                      |                        | 8 fl oz             |
| <b>Mid-Afternoon Snack</b>                                                                                                                                                                                  |                        |                     |
| <b>Light Ice Cream</b>                                                                                                                                                                                      |                        |                     |
|                                                                                                                                                                                                             |                        | <b>1 serving</b>    |
| 1% Milk                                                                                                                                                                                                     |                        | 1/2 cup (140 grams) |
| Hot Fudge or Hot Caramel                                                                                                                                                                                    |                        | 2 Tbsp              |
| <b>Dinner</b>                                                                                                                                                                                               |                        |                     |
| Hamburger patty, 90% lean ground beef, RAW weight**                                                                                                                                                         |                        | 73 grams            |
| Kroger Whole Wheat Hamburger Bun                                                                                                                                                                            |                        | 1 ea                |
| Kroger 2% Fat American Singles, 21 g ea                                                                                                                                                                     |                        | 1/2 ea              |
| Van Camp's Pork & Beans                                                                                                                                                                                     |                        | 1/4 cup             |
| Green Grapes                                                                                                                                                                                                |                        | 20 ea               |
| Water*                                                                                                                                                                                                      |                        | 8 fl oz             |
| *Water can be substituted with beverages sweetened with artificial sweeteners such as Crystal Light or Diet Sodas.<br>Please refer to the Beverages handout for more information about allowable beverages. |                        |                     |
| **73 grams of RAW 90% lean ground burger equals 58 grams of COOKED 90% lean ground burger.                                                                                                                  |                        |                     |



## Example of a DASH-CHICKEN-FISH Menu

### Day 1

Foods in Bold Are Provided by the Metabolic Kitchen

#### Breakfast

|                                   |                   |
|-----------------------------------|-------------------|
| Cheerios                          | 3/4 cup           |
| 1% Milk                           | 16 fl oz (2 cups) |
| Banana                            | 1 large           |
| Ocean Spray Light Cranberry Juice | 6 fl oz (3/4 cup) |
| Coffee (black) - measure 8 oz     | 8 fl oz (1 cup)   |

#### Lunch

##### Chef Salad

|                                  |                 |
|----------------------------------|-----------------|
| <i>Lettuce, Romaine</i>          | 3 cups          |
| <b>Chicken Breast Tenderloin</b> | <b>85 grams</b> |
| <i>Tomato, roma</i>              | 1 ea            |
| <i>Baby Carrots</i>              | 10 ea           |
| <i>Cucumber, cubed or diced</i>  | 1 cup           |
| <i>Mild Shredded Cheese</i>      | 1/4 cup         |
| <b>Croutons</b>                  | <b>1 packet</b> |
| <b>Low Sodium Salad Dressing</b> | <b>40 grams</b> |
| Melba Rounds                     | 4 pieces        |
| Diet Soda                        | 12 fl oz        |

#### Mid-Afternoon Snack

|                         |                 |
|-------------------------|-----------------|
| Honey Multi-Grain Bagel | 1/2 bagel       |
| <b>RF Peanut Butter</b> | <b>10 grams</b> |
| Crystal Light*          | 8 fl oz         |

#### Dinner

|                                   |                       |
|-----------------------------------|-----------------------|
| Kroger Whole Wheat Hamburger Bun  | 1 ea                  |
| <b>Tilapia Fillet</b>             | <b>95 grams</b>       |
| <b>Light Mayo</b>                 | <b>1 Tbsp</b>         |
| Corn on the Cob                   | 1 ea                  |
| <b>Country Crock Margarine</b>    | <b>4 ea</b>           |
| Mandarin Oranges (drink juice)    | 1 1/4 cup             |
| Ocean Spray Light Cranberry Juice | 14 fl oz (1 3/4 cups) |
| 1% Milk                           | 8 fl oz (1 cup)       |

#### Evening Snack

|                |                  |
|----------------|------------------|
| <b>Popcorn</b> | <b>1 serving</b> |
| Diet Soda      | 12 fl oz         |

\*Crystal Light can be substituted with water or other beverages sweetened with artificial sweeteners such as Crystal L  
Please refer to the Beverages handout for more information about allowable beverages.

|                                                            |  |                      |
|------------------------------------------------------------|--|----------------------|
| <b>Day 2- DASH-C/F</b>                                     |  |                      |
| <b>Foods in Bold Are Provided by the Metabolic Kitchen</b> |  |                      |
| <b>Breakfast</b>                                           |  |                      |
| Thomas Hearty Light Multi-Grain English Muffins            |  | 2 ea                 |
| <b>Reduced Fat JIF Peanut Butter</b>                       |  | <b>18 grams</b>      |
| Grapefruit                                                 |  | 1/2 large fruit      |
| Apple Juice                                                |  | 6 fl oz (3/4 cup)    |
| 1% Milk                                                    |  | 8 fl oz (1 cup)      |
| Coffee (black) - measure 8 oz                              |  | 8 fl oz (1 cup)      |
| <b>Lunch</b>                                               |  |                      |
| Soft Taco                                                  |  |                      |
| <i>Ole Extreme Wellness Whole Wheat Tortilla</i>           |  | 1 ea                 |
| <b>Chicken Breast Tenderloin</b>                           |  | <b>65 grams</b>      |
| <i>Lettuce, shredded</i>                                   |  | 1/2 cup              |
| <i>Tomato, diced</i>                                       |  | 1/2 cup              |
| <i>Fat Free Cheddar Shredded Cheese</i>                    |  | 1/4 cup              |
| Baked Tostitos Scoops                                      |  | 20 ea                |
| No Salt Salsa                                              |  | 2 Tbsp               |
| Banana                                                     |  | 1 medium             |
| Blueberries                                                |  | 1 cup                |
| Diet Soda                                                  |  | 12 fl oz             |
| <b>Mid-Afternoon Snack</b>                                 |  |                      |
| Cherry Tomatoes                                            |  | 4 ea                 |
| Baby Carrots                                               |  | 5 ea                 |
| Cucumber, sliced with peel                                 |  | 1/2 cup              |
| <b>Vegetable Dip</b>                                       |  | <b>25 grams</b>      |
| <b>Dinner</b>                                              |  |                      |
| <b>Tilapia Fillet</b>                                      |  | <b>70 grams</b>      |
| Broccoli                                                   |  | 1/2 cup              |
| Kraft American Cheese Slices (19 g each)                   |  | 1 each               |
| King's Hawaiian Honey Wheat Roll                           |  | 1 ea                 |
| <b>Country Crock Margarine</b>                             |  | <b>1 ea</b>          |
| Side Salad                                                 |  |                      |
| <i>Lettuce, Shredded</i>                                   |  | 1 cup                |
| <b>Low Sodium Salad Dressing</b>                           |  | <b>30 grams</b>      |
| Raspberries                                                |  | 1 cup                |
| Ice Tea                                                    |  | 8 fl oz              |
| <b>Evening Snack</b>                                       |  |                      |
| Reduced Fat Vanilla Wafers                                 |  | 8 ea                 |
| 1% Milk                                                    |  | 10 fl oz (1 1/4 cup) |
| Water*                                                     |  | 8 fl oz              |

|                                                                                                                           |  |                   |
|---------------------------------------------------------------------------------------------------------------------------|--|-------------------|
|                                                                                                                           |  |                   |
| <b>Day 3- DASH-C/F</b>                                                                                                    |  |                   |
| <b>Foods in Bold Are Provided by the Metabolic Kitchen</b>                                                                |  |                   |
|                                                                                                                           |  |                   |
| <b>Breakfast</b>                                                                                                          |  |                   |
| Kroger Carbmaster Yogurt                                                                                                  |  | 1 container       |
| <b>Quaker Natural Granola - Oats, Honey &amp; Raisins</b>                                                                 |  | <b>25 grams</b>   |
| Banana                                                                                                                    |  | 1 large           |
| Orange Juice                                                                                                              |  | 8 fl oz (1 cup)   |
| 1% Milk                                                                                                                   |  | 6 fl oz (3/4 cup) |
| Coffee (black) - measure 8 oz                                                                                             |  | 1 cup             |
|                                                                                                                           |  |                   |
| <b>Lunch</b>                                                                                                              |  |                   |
| Tomato Soup (25% less sodium)                                                                                             |  | 1/4 cup           |
| Low Sodium Oyster Crackers                                                                                                |  | 10 ea             |
| Healthy Life 100% Whole Wheat Bread                                                                                       |  | 1 slices          |
| <b>Tilapia Fillet</b>                                                                                                     |  | <b>120 grams</b>  |
| <b>Country Crock Margarine</b>                                                                                            |  | <b>5 each</b>     |
| Apple                                                                                                                     |  | 1 large           |
| Apple Pear Fruit Crisp                                                                                                    |  | 1 each            |
| Crystal Light*                                                                                                            |  | 8 fluid oz        |
|                                                                                                                           |  |                   |
| <b>Mid-Afternoon Snack</b>                                                                                                |  |                   |
| Celery strips, 4" long                                                                                                    |  | 8 ea              |
| <b>JIF Peanut Butter</b>                                                                                                  |  | <b>25 grams</b>   |
| Diet Soda                                                                                                                 |  | 1 can             |
|                                                                                                                           |  |                   |
| <b>Dinner</b>                                                                                                             |  |                   |
| <b>Chicken Breast Tenderloin</b>                                                                                          |  | <b>125 grams</b>  |
| Gravy, turkey or pork, in jar                                                                                             |  | 1 Tbsp            |
| Healthy Life 100% Whole Wheat Bread                                                                                       |  | 1 slices          |
| <b>Country Crock Margarine</b>                                                                                            |  | <b>6 ea</b>       |
| <b>Jelly, reduced sugar</b>                                                                                               |  | <b>2 packet</b>   |
| Sweet Potato (cooked, without skin)                                                                                       |  | 1 each            |
| <b>Mini Marshmallows</b>                                                                                                  |  | <b>40 ea</b>      |
| Green Beans                                                                                                               |  | 1/2 cup           |
| Mixed Fruit                                                                                                               |  | 1 cup             |
| 1% Milk                                                                                                                   |  | 8 fl oz (1 cup)   |
| Ice Tea                                                                                                                   |  | 8 fl oz           |
|                                                                                                                           |  |                   |
| <b>Evening Snack</b>                                                                                                      |  |                   |
| <b>Quaker Chocolate Chunk Granola Bar</b>                                                                                 |  | <b>2 ea</b>       |
| Water*                                                                                                                    |  | 8 fl oz           |
| <i>*Water can be substituted with beverages sweetened with artificial sweeteners such as Crystal Light or Diet Sodas.</i> |  |                   |
| <i>Please refer to the Beverages handout for more information about allowable beverages.</i>                              |  |                   |
|                                                                                                                           |  |                   |

| <b>Day 4- DASH-C/F</b>                                     |  |                       |
|------------------------------------------------------------|--|-----------------------|
| <b>Foods in Bold Are Provided by the Metabolic Kitchen</b> |  |                       |
| <b>Breakfast</b>                                           |  |                       |
| Cheerios                                                   |  | 1 cup                 |
| 1% Milk                                                    |  | 12 fl oz (1 1/2 cups) |
| Peaches                                                    |  | 1 cup                 |
| Orange Juice                                               |  | 8 fl oz (1 cup)       |
| Coffee (black) - measure 8 oz                              |  | 1 cup                 |
| <b>Lunch</b>                                               |  |                       |
| Chicken Quesadilla                                         |  |                       |
| <i>Thomas Hearty Multi-Grain Light English Muffins</i>     |  | 2 ea                  |
| <b>Chicken Breast Tenderloin</b>                           |  | <b>60 grams</b>       |
| <i>Reduced Fat Cheddar Cheese</i>                          |  | 1/4 cup               |
| <i>Onion, chopped</i>                                      |  | 1/4 cup               |
| Banana                                                     |  | 1 large               |
| Cherry Tomatoes                                            |  | 8 ea                  |
| Baby Carrots                                               |  | 8 ea                  |
| <b>Vegetable Dip</b>                                       |  | <b>30 grams</b>       |
| Diet Soda                                                  |  | 1 can                 |
| Water*                                                     |  | 8 fluid oz            |
| <b>Mid-Afternoon Snack</b>                                 |  |                       |
| Carbmaster Yogurt                                          |  | 1 container           |
| <b>Quaker Natural Granola</b>                              |  | <b>15 grams</b>       |
| Crystal Light*                                             |  | 8 fl oz               |
| <b>Dinner</b>                                              |  |                       |
| Chicken Waldroff Salad                                     |  |                       |
| <b>Chicken Breast Tenderloin</b>                           |  | <b>92 grams</b>       |
| Romaine Lettuce, Shredded                                  |  | 2 1/2 cups            |
| Green Beans                                                |  | 1 cup                 |
| Mushrooms                                                  |  | 1/2 cup               |
| Pears                                                      |  | 1 cup                 |
| <b>Low Sodium Salad Dressing</b>                           |  | <b>50 grams</b>       |
| Peas                                                       |  | 1/2 cup               |
| <b>Country Crock Margarine</b>                             |  | <b>5 ea</b>           |
| Melba Rounds                                               |  | 4 ea                  |
| Apple Pear Fruit Crisp                                     |  | 1 ea                  |
| Water*                                                     |  | 8 fl oz               |
| <b>Evening Snack</b>                                       |  |                       |
| <b>Popcorn</b>                                             |  | <b>1 serving</b>      |
| Diet Soda (any flavor)                                     |  | 1 12 oz can           |

|                                                                                                                                                                                                             |                                                        |                       |
|-------------------------------------------------------------------------------------------------------------------------------------------------------------------------------------------------------------|--------------------------------------------------------|-----------------------|
| <b>Day 5- DASH-C/F</b>                                                                                                                                                                                      |                                                        |                       |
| <b>Foods in Bold Are Provided by the Metabolic Kitchen</b>                                                                                                                                                  |                                                        |                       |
| <b>Breakfast</b>                                                                                                                                                                                            |                                                        |                       |
| Quaker Instant Oatmeal (any fruit & cream variety)                                                                                                                                                          |                                                        | 1 ea                  |
| <b>Country Crock Margarine</b>                                                                                                                                                                              |                                                        | <b>3 ea</b>           |
| Grapefruit                                                                                                                                                                                                  |                                                        | 1/2 large fruit       |
| 1% Milk                                                                                                                                                                                                     |                                                        | 14 fl oz (1 3/4 cups) |
| <b>Lunch</b>                                                                                                                                                                                                |                                                        |                       |
| Chicken Sandwich:                                                                                                                                                                                           |                                                        |                       |
|                                                                                                                                                                                                             | <i>Kroger Whole Wheat Hamburger Bun</i>                | 1 ea                  |
|                                                                                                                                                                                                             | <b>Chicken Breast Tenderloin</b>                       | <b>118 grams</b>      |
|                                                                                                                                                                                                             | <i>Lettuce, inner leaf</i>                             | 2 ea                  |
|                                                                                                                                                                                                             | <i>Tomato, slice</i>                                   | 1 ea                  |
|                                                                                                                                                                                                             | <b>Light Mayonnaise</b>                                | <b>2 Tbsp</b>         |
| Lay's Lightly Salted Potato Chips                                                                                                                                                                           |                                                        | 15 ea                 |
| Kiwi Fruit                                                                                                                                                                                                  |                                                        | 1 ea                  |
| Crystal Light                                                                                                                                                                                               |                                                        | 1 packet              |
| <b>Mid-Afternoon Snack</b>                                                                                                                                                                                  |                                                        |                       |
| Baby Carrots, raw                                                                                                                                                                                           |                                                        | 10 each               |
| <b>Vegetable Dip</b>                                                                                                                                                                                        |                                                        | <b>25 grams</b>       |
| Edy's Frozen Fruit Bar                                                                                                                                                                                      |                                                        | 1 ea                  |
| Diet Soda (any flavor)                                                                                                                                                                                      |                                                        | 1 can                 |
| <b>Dinner</b>                                                                                                                                                                                               |                                                        |                       |
| <u>Pizza:</u>                                                                                                                                                                                               |                                                        |                       |
|                                                                                                                                                                                                             | <i>Thomas Hearty Multi-Grain Light English Muffins</i> | 1 ea                  |
|                                                                                                                                                                                                             | <i>Pizza Sauce</i>                                     | 3/4 cup               |
|                                                                                                                                                                                                             | <b>Tilapia Fillet</b>                                  | <b>68 grams</b>       |
|                                                                                                                                                                                                             | <i>Pineapple</i>                                       | 1 cup                 |
|                                                                                                                                                                                                             | <i>Fat Free Mozzarella Cheese</i>                      | 1/3 cup               |
| Frozen Yogurt                                                                                                                                                                                               |                                                        | 3/4 cup               |
| Raspberries                                                                                                                                                                                                 |                                                        | 3/4 cup               |
| Water*                                                                                                                                                                                                      |                                                        | 8 fl oz               |
| <b>Evening Snack</b>                                                                                                                                                                                        |                                                        |                       |
| <b>Quaker Chocolate Chunk Granola Bar</b>                                                                                                                                                                   |                                                        | <b>1 ea</b>           |
| 1% Milk                                                                                                                                                                                                     |                                                        | 8 fl oz (1 cup)       |
| Apple                                                                                                                                                                                                       |                                                        | 1 large               |
| *Water can be substituted with beverages sweetened with artificial sweeteners such as Crystal Light or Diet Sodas.<br>Please refer to the Beverages handout for more information about allowable beverages. |                                                        |                       |

| <b>Day 6- DASH-C/F</b>                                     |  |                       |
|------------------------------------------------------------|--|-----------------------|
| <b>Foods in Bold Are Provided by the Metabolic Kitchen</b> |  |                       |
| <b>Breakfast</b>                                           |  |                       |
| Kellogg's Eggo Golden Oat Waffles                          |  | 2 ea                  |
| <b>Country Crock Margarine</b>                             |  | <b>2 ea</b>           |
| Syrup                                                      |  | 2 Tbsp.               |
| Blueberries                                                |  | 3/4 cup               |
| 1% Milk                                                    |  | 12 fl oz (1 3/4 cups) |
| Banana                                                     |  | 1 large               |
| Coffee (black) - measure 8 oz                              |  | 1 cup                 |
| <b>Lunch</b>                                               |  |                       |
| <u>Fish &amp; Veggie Wrap</u>                              |  |                       |
| <i>Ole Extreme Wellness Whole Wheat Tortilla</i>           |  | 1 ea                  |
| <b><i>Tilapia Fillet</i></b>                               |  | <b>57 grams</b>       |
| <i>Lettuce, shredded</i>                                   |  | 1 cup                 |
| <i>Tomatoes, diced</i>                                     |  | 1 cup                 |
| <b><i>Light Mayonnaise</i></b>                             |  | <b>2 tsp</b>          |
| Melba Rounds                                               |  | 4 ea                  |
| Strawberries                                               |  | 1 1/2 cups            |
| 1% Milk                                                    |  | 8 fl oz (1 cup)       |
| Crystal Light*                                             |  | 1 packet              |
| <b>Mid-Afternoon Snack</b>                                 |  |                       |
| Celery, 4 inch strips                                      |  | 8 ea                  |
| <b>JIF Peanut Butter</b>                                   |  | <b>32 g</b>           |
| Crystal Light*                                             |  | 1 packet              |
| <b>Dinner</b>                                              |  |                       |
| Southwestern Chicken Salad                                 |  |                       |
| <i>Lettuce, romaine, shredded</i>                          |  | 2 cups                |
| <i>Canola Oil</i>                                          |  | 1 Tbsp                |
| <b><i>Chicken Breast Tenderloin</i></b>                    |  | <b>86 grams</b>       |
| <i>Onions, chopped</i>                                     |  | 1/4 cup               |
| <i>Reduced Fat Cheddar Cheese, Shredded</i>                |  | 1/2 cup               |
| <i>Salsa</i>                                               |  | 1/4 cup               |
| <i>Corn</i>                                                |  | 1/2 cup               |
| Baked Tostitos Scoops                                      |  | 20 ea                 |
| Mandarin Oranges (drink juice)                             |  | 1 cup                 |
| Peach Fruit Crisp                                          |  | 1 ea                  |
| 1% Milk                                                    |  | 8 fl oz (1 cup)       |
| Edy's Frozen Fruit Bar                                     |  | 1 each                |
| Ice Tea                                                    |  | 12 fl oz              |
| <b>Evening Snack</b>                                       |  |                       |
| <b>Popcorn</b>                                             |  | <b>1 serving</b>      |
| Diet Soda                                                  |  | 1 can                 |

|                                                                                                                                                                                                             |                        |                       |
|-------------------------------------------------------------------------------------------------------------------------------------------------------------------------------------------------------------|------------------------|-----------------------|
| <b>Day 7- DASH-C/F</b>                                                                                                                                                                                      |                        |                       |
| <b>Foods in Bold Are Provided by the Metabolic Kitchen</b>                                                                                                                                                  |                        |                       |
| <b>Breakfast</b>                                                                                                                                                                                            |                        |                       |
| Honey Multi-Grain Bagel                                                                                                                                                                                     |                        | 1 ea                  |
| <b>Country Crock Margarine</b>                                                                                                                                                                              |                        | <b>3 ea</b>           |
| <b>Jelly, reduced sugar</b>                                                                                                                                                                                 |                        | <b>3 packets</b>      |
| Strawberries                                                                                                                                                                                                |                        | 1 cup                 |
| 1 % Milk                                                                                                                                                                                                    |                        | 10 fl oz (1 1/4 cups) |
| Coffee (black) - measure 8 oz                                                                                                                                                                               |                        | 1 cup                 |
| <b>Lunch</b>                                                                                                                                                                                                |                        |                       |
| <u>Asian Beef Stir-Fry</u>                                                                                                                                                                                  |                        |                       |
|                                                                                                                                                                                                             | <b>Beef Tenderloin</b> | <b>38 grams</b>       |
|                                                                                                                                                                                                             | Canola Oil             | 1 Tbsp                |
|                                                                                                                                                                                                             | Broccoli               | 1 cup                 |
|                                                                                                                                                                                                             | Mushrooms              | 1/2 cup               |
|                                                                                                                                                                                                             | Corn                   | 1/2 cup               |
|                                                                                                                                                                                                             | Snowpeas               | 1/2 cup               |
|                                                                                                                                                                                                             | Soy Sauce              | 2 tsp                 |
|                                                                                                                                                                                                             | Brown Rice             | 1 1/4 cup             |
|                                                                                                                                                                                                             | Peas & Carrots         | 1/2 cup               |
|                                                                                                                                                                                                             | Pineapple              | 1 cup                 |
| Water*                                                                                                                                                                                                      |                        | 8 fl oz               |
| <b>Mid-Afternoon Snack</b>                                                                                                                                                                                  |                        |                       |
| Kroger Carbmaster Yogurt (any flavor)                                                                                                                                                                       |                        | 1 container           |
| <b>Quaker Natural Granola</b>                                                                                                                                                                               |                        | <b>20 g</b>           |
| <b>Dinner</b>                                                                                                                                                                                               |                        |                       |
| <b>Beef Tenderloin</b>                                                                                                                                                                                      |                        | <b>67 g</b>           |
| Ore Ida Steam & Cut Mash Potatoes                                                                                                                                                                           |                        | 1 1/3 cup             |
| Gravy, turkey or pork, in jar                                                                                                                                                                               |                        | 1/4 cup               |
| King's Hawaiian Honey Wheat Rolls                                                                                                                                                                           |                        | 1 ea                  |
| <b>Country Crock Margarine</b>                                                                                                                                                                              |                        | <b>5 ea</b>           |
| Peas                                                                                                                                                                                                        |                        | 1/2 cup               |
| Kroger Fat Free Cottage Cheese                                                                                                                                                                              |                        | 1/3 cup               |
| Peaches                                                                                                                                                                                                     |                        | 1 cup                 |
| Edy's Frozen Fruit Bar                                                                                                                                                                                      |                        | 1 each                |
| Ice Tea                                                                                                                                                                                                     |                        | 8 fl oz               |
| <b>Evening Snack</b>                                                                                                                                                                                        |                        |                       |
| <b>Quaker Chocolate Chunk Granola Bar</b>                                                                                                                                                                   |                        | <b>1 ea</b>           |
| *Water can be substituted with beverages sweetened with artificial sweeteners such as Crystal Light or Diet Sodas.<br>Please refer to the Beverages handout for more information about allowable beverages. |                        |                       |
